# Supplementary material for: Network meta-analysis with dose-response relationships
Source: Research Square preprint supplement (doi:10.21203/rs.3.rs-7903334/v1), 2025-11-05

Log Risk Ratio

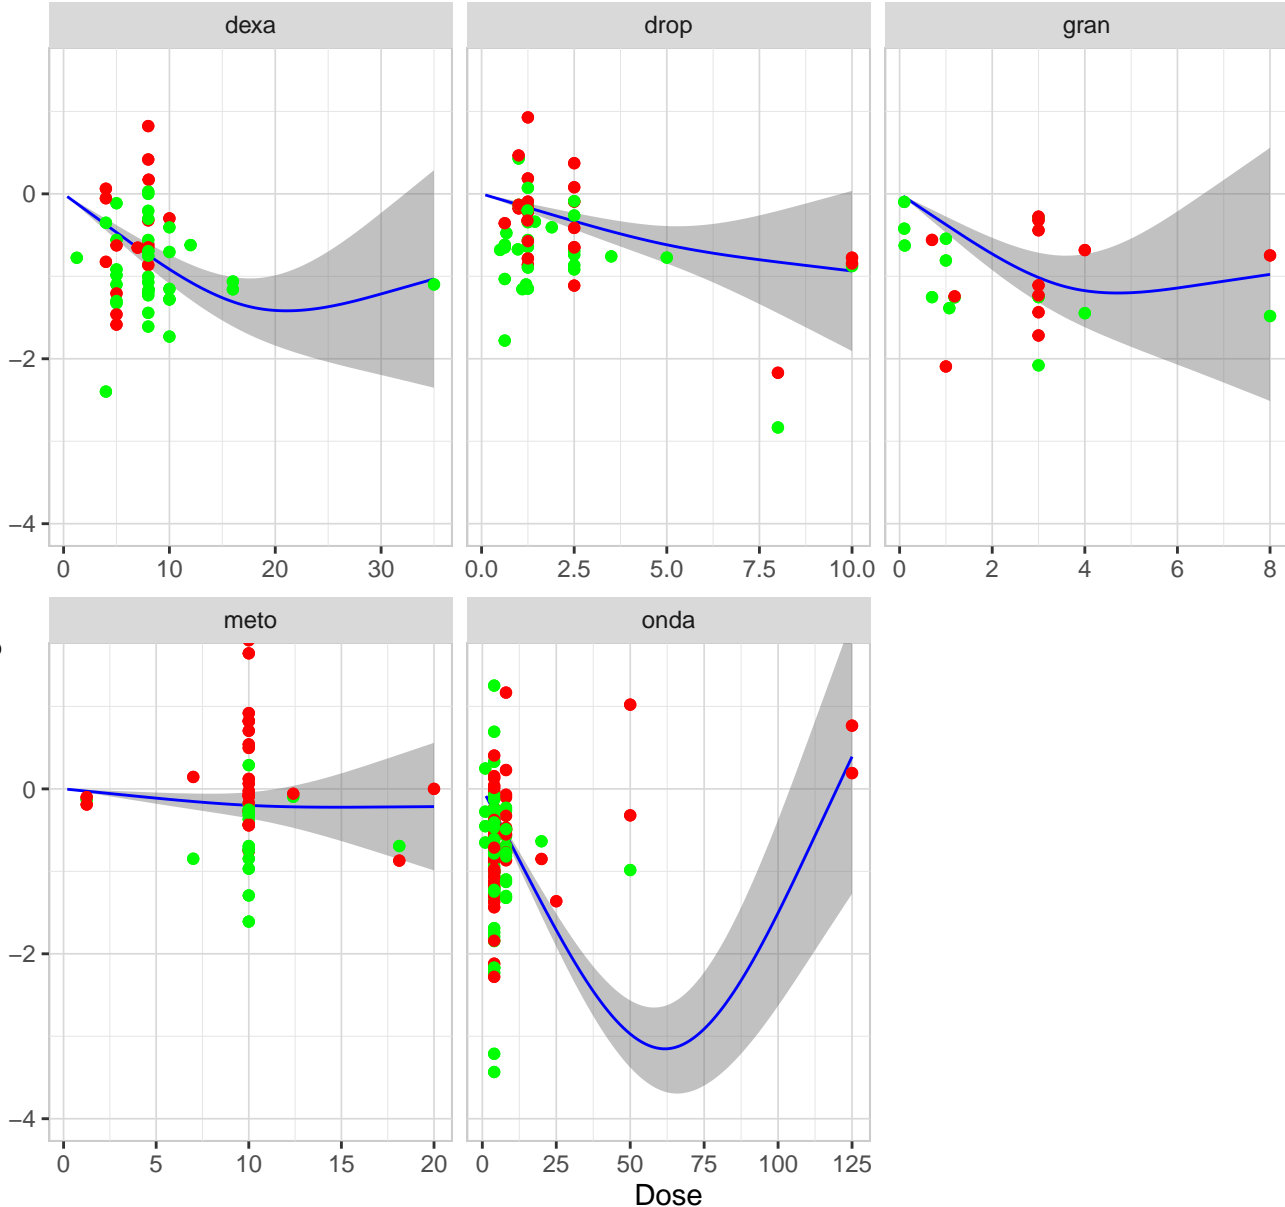

Supplement: Supplementary file [file 4cd649fc3494c0dda2694cbe.pdf]
